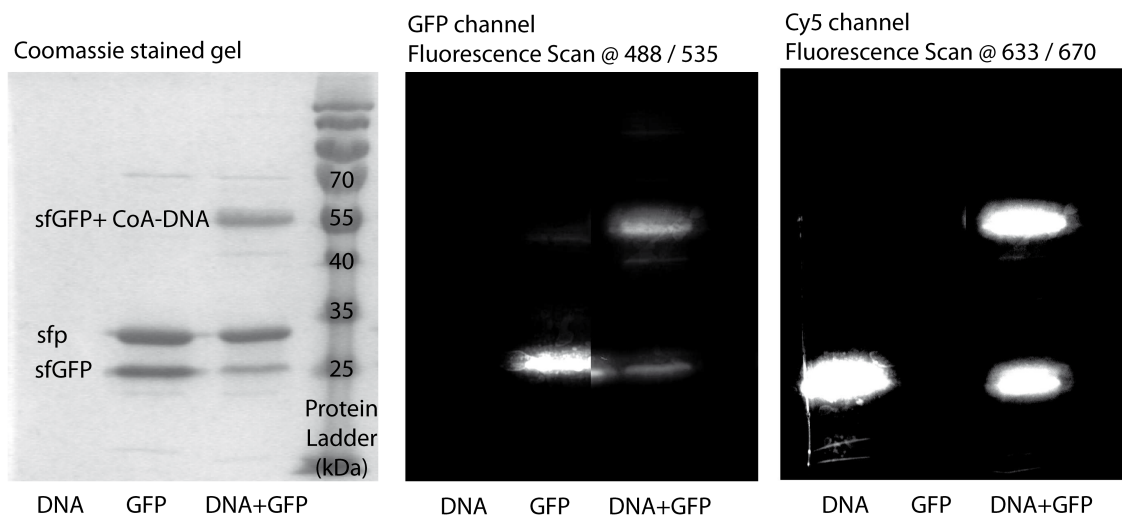

**Figure S1. Coupling of CoA-DNA to ybbR-tagged GFP.**

SDS-PAGE gel displaying the coupling between CoenzymeA-modified DNA to the ybbR-sfGFP construct in both fluorescence scans and Coomassie staining. In this sample gel, both GFP and CoA-DNA were mixed in equal concentrations (5 $\mu$ M) as in the standard protocol [1].

## References

1. Yin J, Lin AJ, Golan DE, Walsh CT (2006) Site-specific protein labeling by Sfp phosphopantetheinyl transferase. *Nat Protoc.* pp. 280-285.
